# Supplementary material
Source: PubMed Central journal article supplement (PMC4881793)
Supplement: supp_2014.00288_Supplementary_Materials.pdf [file supp_2014.00288_Supplementary_Materials.pdf]

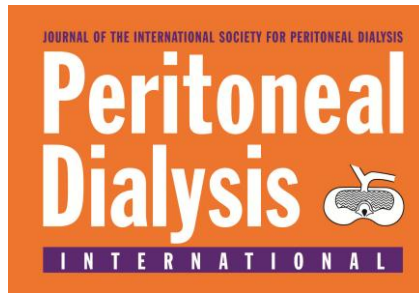

**Supplemental Materials for  
The Peritoneal Dialysis Outcomes and Practice Patterns Study (PDOPPS): Unifying Efforts to  
Inform Practice and Improve Global Outcomes in Peritoneal Dialysis**

**Jeffrey Perl, Simon Davies, Mark Lambie, Ronald Pisoni, Keith McCullough, David Johnson, James  
Sloand, Sarah Prichard, Hideki Kawanishi, Francesca Tentori, Bruce Robinson**

**Figure Legends:**

**Supplementary Figures**

**Supplementary Figure 1:** Unadjusted 1, 2 and 3-year Peritoneal Dialysis Death-Censored Technique Survival (%) In Four Countries Enrolled in PDOPPS. Abbreviations: PDOPPS, Peritoneal Dialysis Outcomes and Practice Patterns Study; NZ, New Zealand

Adapted From: Nakamoto et al Perit Dial Int. 2006 Mar-Apr;26(2):136-43, Jose et al *Nephrology* 16 (2011) 19–29 , Perl... Nessim et al CJASN 2012

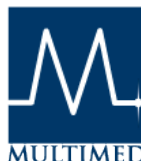

**Supplementary Figure 2:** High Regional Variation in Technique Failure and Mortality: data from Canada.

Adjusted for age, gender, race, body mass index, end stage renal disease cause, comorbidity index, PD modality (automated vs. continuous ambulatory PD) employing inverse probability of treatment and censoring weighting.

Abbreviations: PD, peritoneal dialysis

## Supplementary Figures

**Supplementary Figure 1:** Unadjusted 1, 2 and 3-year Peritoneal Dialysis Death-Censored Technique Survival (%) In Four Countries Enrolled in PDOPPS.

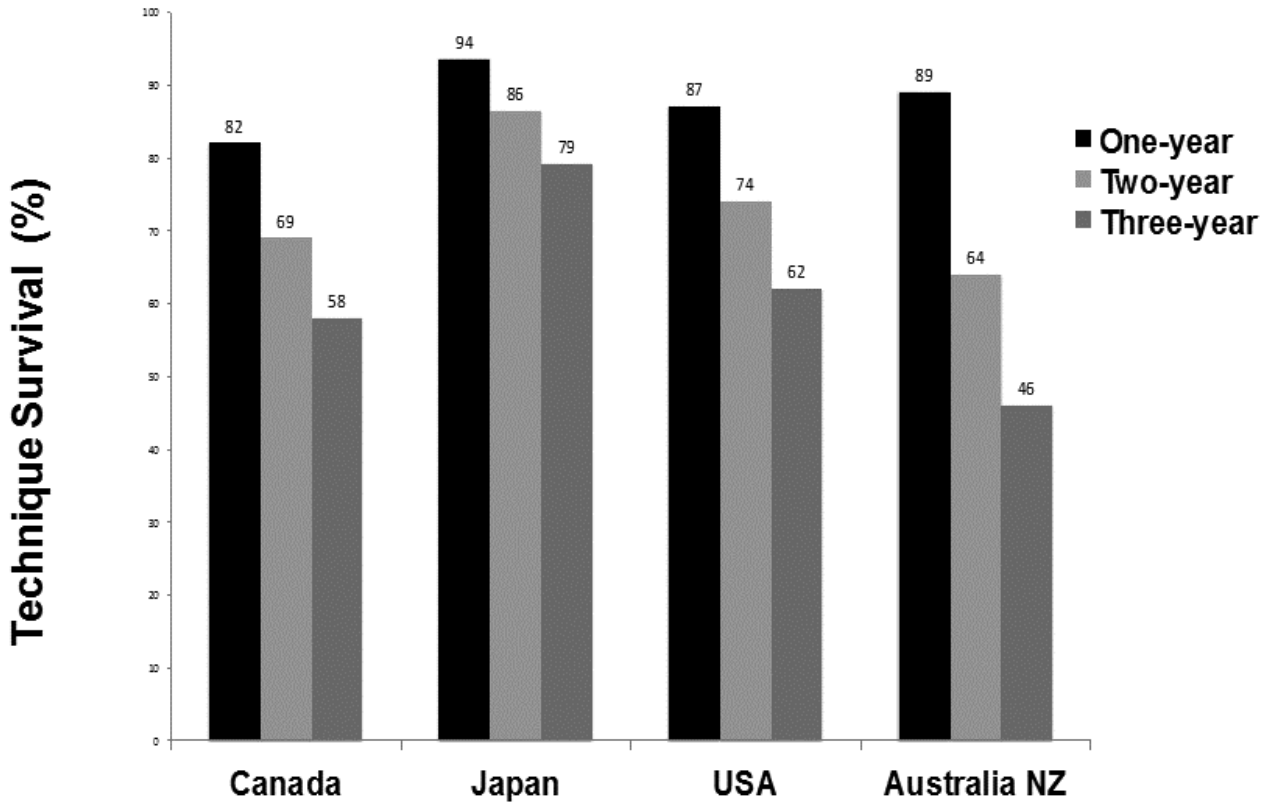

Adapted From: Nakamoto et al *Perit Dial Int.* 2006 Mar-Apr;26(2):136-43, Jose et al *Nephrology* 16 (2011) 19-29, Perl...  
Nessim et al *CJASN* 2012

**Supplementary Figure 2:** High Regional Variation in Technique Failure and Mortality: data from Canada.

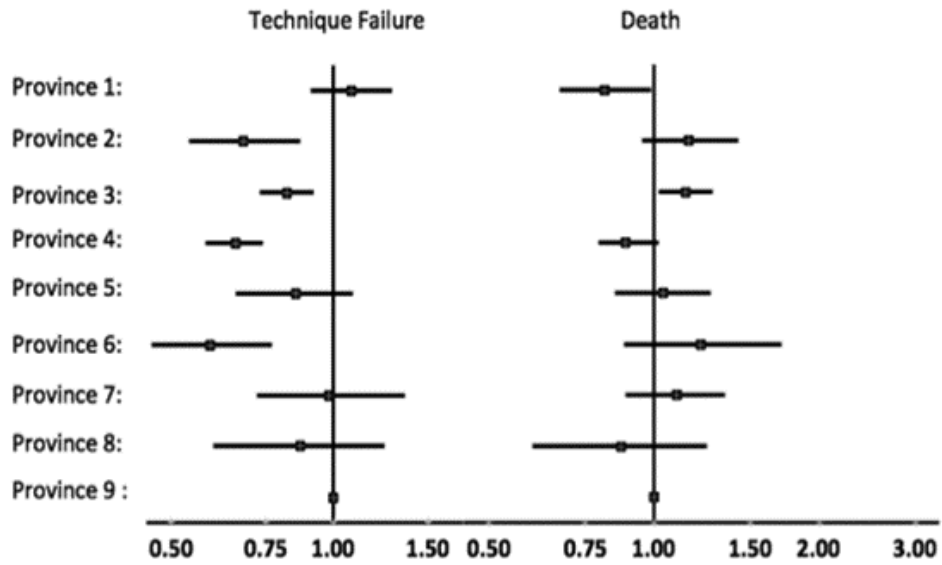

Adjusted for age, gender, race, body mass index, end stage renal disease cause, comorbidity index, PD modality (automated vs. continuous ambulatory PD) employing inverse probability of treatment and censoring waiting
